# Supplementary material for: Bivariate Spatial Pattern between Smoking Prevalence and Lung Cancer Screening in US Counties
Source: PubMed Central journal article supplement (PMC7277441; doi:10.3390/ijerph17103383), 2020-05-13
Supplement: ijerph-17-03383-s001.pdf [file ijerph-17-03383-s001.pdf]

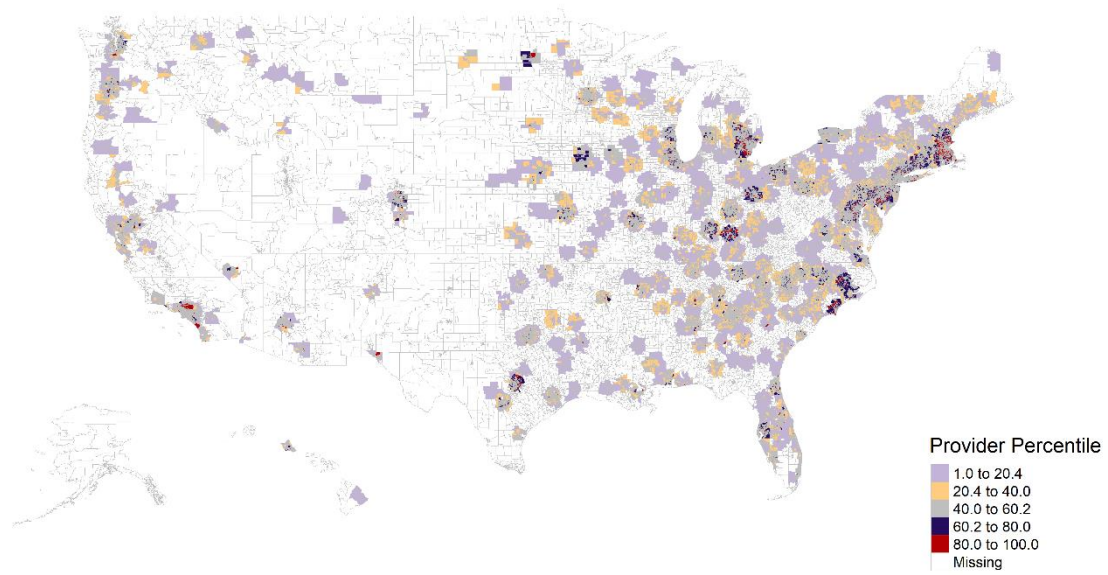

**Figure 1.** Census-tract-level density of providers, who provided low-dose computed tomography (LDCT) services for lung cancer screening, per 100 Medicare fee-for-service beneficiaries, 2016.
